# Supplementary material
Source: Research Square preprint supplement (doi:10.21203/rs.3.rs-9117388/v1)
Supplement: Supplementary file 2 [file b8669bbaf62565f8722de3fe.pdf]

## **Supplementary File 2. Interview guide for focus group discussions and key informants**

### **Interview guide for regional-level key informants senior officials in the Stockholm and the Västra Götaland regions**

#### **General orientation of the organisation**

3. Could you describe the organisation's overall mission (main focus, primary commissioning body, mandate, etc.)?
4. Which thematic areas does the organisation work with (universal programmes, targeted programmes, or other types of initiatives)?
5. Could you describe your organisation's role in relation to pandemics in general (not specifically COVID-19)?

#### **The COVID-19 pandemic specifically**

8. Could you describe how the work related to COVID-19 began within the organisation (which units were involved, the initial organisation of the work, initial areas of focus, and interventions)?
9. Did this structure and focus continue throughout the pandemic, or did the nature or character of the work change over time? If yes, in what ways did it change, and what factors determined or inspired these changes?
10. Which other organisations have you (a) collaborated with and (b) been in dialogue with regarding pandemic-related issues (governmental, local, individual actors)? What did this collaboration look like (how it was initiated, type of collaboration)? Are there any of these actors with whom, in hindsight, you would have wished to collaborate earlier or in greater depth?
11. Have you worked with specific target groups or geographical areas? If yes, how, and what does the process look like when deciding on such priorities? Are there any groups with whom, in hindsight, you would have wished to engage earlier or more extensively?
12. In your view, what have been the greatest challenges in your work (in terms of achieving your objectives, and why)?
13. What resources, information, or other support do you think might have mitigated these challenges (in an ideal scenario, and why)?
14. Are there themes that were not prioritised but which you now think should have been given more attention (which themes and why)? What do you think may explain why these themes or groups did not receive sufficient attention?
15. What are the most important lessons that you have drawn from this experience and will carry forward: what could or should you, in hindsight, have done differently?

## **Interview guide for focus group discussions (or individual interviews) with representatives from civil society and representatives from local health and healthcare actor**

### **General orientation of the respective organisations**

1. Could each of you briefly describe the overall mission of your organisation, its main areas of responsibility, and the geographical area within which you operate?
2. Could you also briefly describe whether you have previously worked with themes similar to the COVID-19 pandemic (e.g., other pandemics or comparable health-related issues)?

### **The COVID-19 pandemic specifically**

1. Could you describe how the work related to COVID-19 began within your organisation (which units were involved, the initial organisation of the work, initial areas of focus, and interventions)?
2. Did this structure and focus continue throughout the pandemic, or did the nature or character of the work change over time? If yes, in what ways did it change, and what factors determined or inspired these changes?
3. Which other organisations have you (a) collaborated with and (b) been in dialogue with regarding pandemic-related issues (governmental, local, individual actors)? What did this collaboration look like (how it was initiated, type of collaboration)?
4. Have those you represent approached you with questions or concerns that your organisation itself had not initially recognised as important? If yes, what does the process look like when you integrate new priorities? Are there any of these issues that, in hindsight, you would have wished to address earlier or in greater depth?
5. In your view, what have been the greatest challenges in your work (in terms of achieving your objectives, and why)? What resources, information, or other support do you think might have mitigated these challenges (in an ideal scenario, and why)?
6. Are there themes or groups that, in your view, have not received sufficient attention (and from whom), but which you believe should have been given greater priority (which groups/themes and why)? What do you think may explain this situation?
7. What are the most important lessons that you have drawn from this experience and will carry forward: what could or should you, in hindsight, have done differently?
